# Supplementary material
Source: Research Square preprint supplement (doi:10.21203/rs.3.rs-9510855/v1)
Supplement: Supplementary file 1 [file b1944920008e433d1a3b9fb5.xlsx]

## Sheet: Supplementary table 1
Supplementary Table 1. Laboratory findings of the participant with PHP1C.
Laboratory test (Measurement units)	Value (Reference range)
Calcium (mg/dL)	8.1 (8.4-10.2)
Phosphorus (mg/dL)	4.7 (2.5-4.5)
PTH (pg/ml)	377.3 (10-65)
fT4 (μg/dL)	0.8 (3.2-12.6)
TSH (μIU/mL)	6.40 (0.35-5.5)
Estradiol (E2) (pg/ml)	20 (1-450)
LH (mIU/ml)	5.5 (0-52.8)
FSH (mIU/ml)	8.3 (0.3-93.3)
PTH: parathyroid hormone; fT4: free tetraiodothyronine;
TSH: thyroid stimulating hormone; LH: luteinizing hormone; FSH: follicle-stimulating hormone.
